# Supplementary material for: Intraoperative Neurophysiological Monitoring in Neurosurgery
Source: MDPI journal article supplement (doi:10.3390/jcm13102966), 2024-05-17
Supplement: s1 [file s1]

# INTRAOPERATIVE NEUROPHYSIOLOGICAL MONITORING IN NEUROSURGERY

Giusy Guzzi, Riccardo Antonio Ricciuti, Attilio Della Torre, Erica Lo Turco, Angelo Lavano, Federico Longhini and Domenico La Torre.

## SUPPLEMENTARY MATERIALS

### SEARCH STRATEGY

("Intraoperative Neurophysiological Monitoring" [MeSH] OR "electrocorticography" [MeSH] OR "electromyography" [MeSH] OR "Evoked Potentials" [MeSH] OR "Intraoperative Neurophysiological Monitoring" [All fields] OR "neuromonitoring" [All fields] OR "electrocorticography" [All fields] OR "Electrocorticographies" [All fields] OR "ECoG" [All fields] OR "stereo-electroencephalography" [All fields] OR "electromyography" [All fields] OR "EMG" [All fields] OR "Electromyogram" [All fields] OR "somatosensory evoked potentials" [All fields] OR "SSEP" [All fields] OR "motor evoked potential" [All fields] OR "MEP" [All fields] OR "brainstem auditory evoked potentials" [All fields] OR "BAEP" [All fields] OR "auditory evoked potentials" [All fields] OR "visual evoked potentials" [All fields] OR "VEP" [All fields] OR "direct cortical stimulation" [All fields]) AND ("Neurosurgery" [MeSH] OR "Neurosurgical procedure" [MeSH] OR "Neurosurgery" [All fields] OR "Neurosurgical Procedure" [All fields] OR "Spinal Surgery" [All fields] OR "Peripheral Nerve Surgery" [All fields] OR "Brain surgery" [All fields])

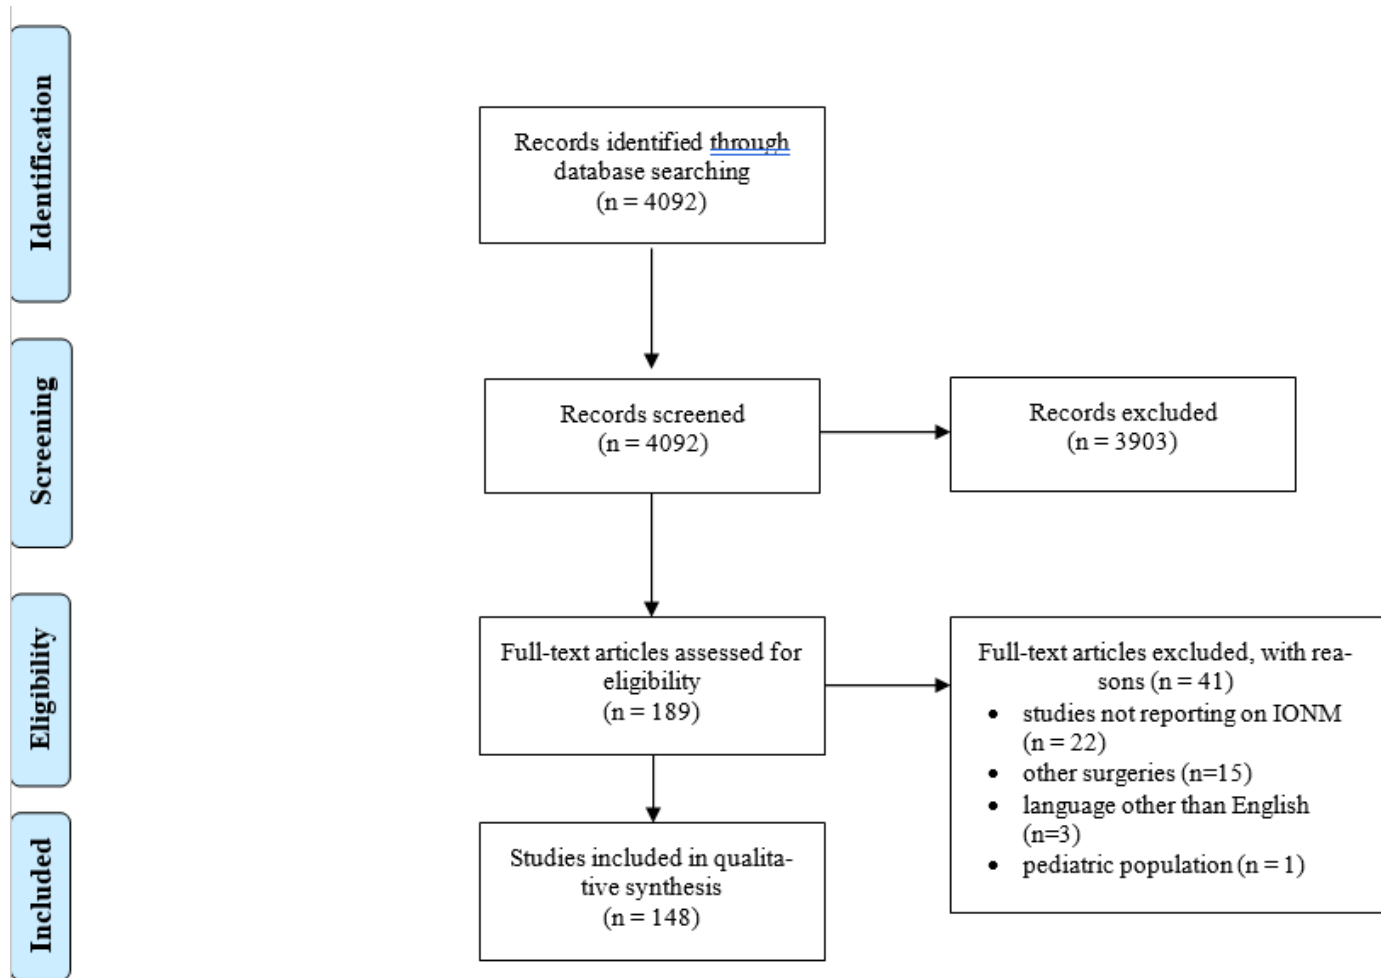

FIGURE S1. FLOW DIAGRAM.

Study flow diagram according to the Preferred Reporting Items for Systematic review and Meta-Analysis Protocols recommendations.
